# Supplementary material for: Pten is a key intrinsic factor regulating raphe 5-HT neuronal plasticity and depressive behaviors in mice
Source: PubMed Central journal article supplement (PMC7998026; doi:10.1038/s41398-021-01303-z), 2021-03-26
Supplement: 41398_2021_1303_MOESM1_ESM.pdf [file 41398_2021_1303_MOESM1_ESM.pdf]

***Pten* is a key intrinsic factor regulating raphe 5-HT neuronal plasticity and depressive behaviors in mice**

Ling Chen<sup>1,2</sup>, Wan-Kun Gong<sup>2</sup>, Cui-ping Yang<sup>2</sup>, Chan-Chan Shao<sup>2</sup>, Ning-Ning Song<sup>3</sup>, Jia-Yin Chen<sup>2</sup>, Li-Qiang Zhou<sup>4</sup>, Kun-Shan Zhang<sup>4</sup>, Siguang Li<sup>4</sup>, Zhili Huang<sup>3</sup>, Gal Richter-Levin<sup>5</sup>, Lin Xu<sup>6\*</sup>, Yu-Qiang Ding<sup>2,3,7\*</sup>

Supplementary figures

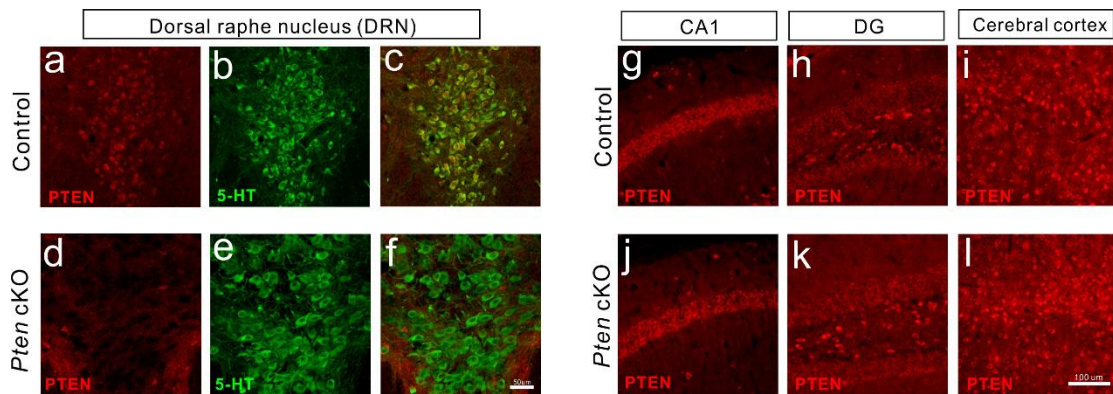

**Supplementary Fig. 1. Selective deletion of PTEN in neurons expressing 5-HT.**  
**a-c.** Co-localization of 5-HT and PTEN in the dorsal raphe nucleus of control mice.  
**d-f.** PTEN signal is absent in 5-HT<sup>+</sup> neurons of *Pten* cKO mice.  
**g-l.** Similar PTEN expression is present in the hippocampal CA1 region, dentate gyrus (DG) and cerebral cortex of control (**g-i**) and *Pten* cKO mice (**j-l**). Scale bars = 100 μm.

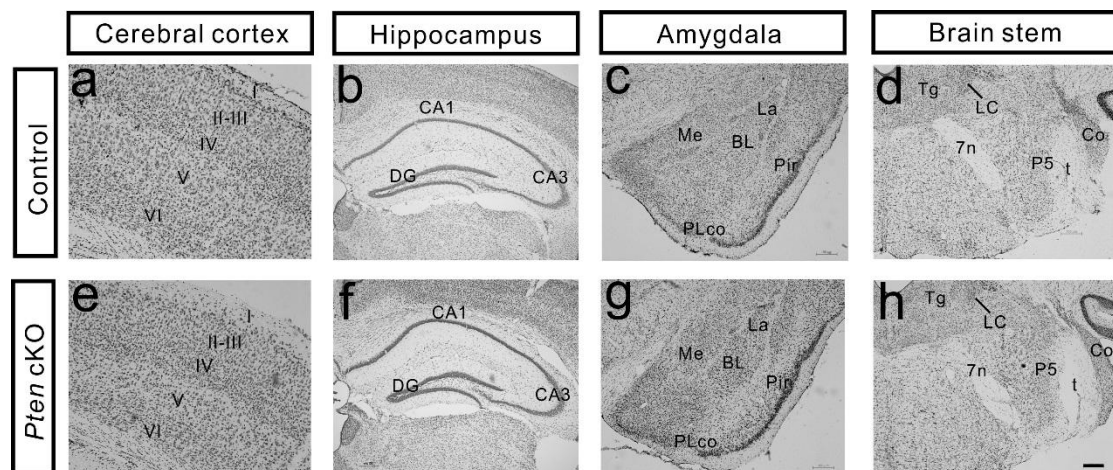

**Supplementary Fig. 2. The cellular architecture shown by Nissl staining is normal in the brain of *Pten* cKO mice relative to controls.**

7n, facial nerve; BL, basolateral nucleus of amygdala; CA1 and CA3, CA1 and CA3

subfields of hippocampus; Co, cochlear nucleus; DG, dentate gyrus; I-VI, cortical layers; Me, medial nucleus of amygdala; La, lateral nucleus of amygdala; LC, locus ceruleus; P5, principal nucleus of trigeminal nerve; Pir, piriform cortex; PLCo, posterolateral cortical amygdaloid nucleus; t, trigeminal tract; Tg, pontine tegmental nucleus. Scale bar = 100  $\mu$ m.

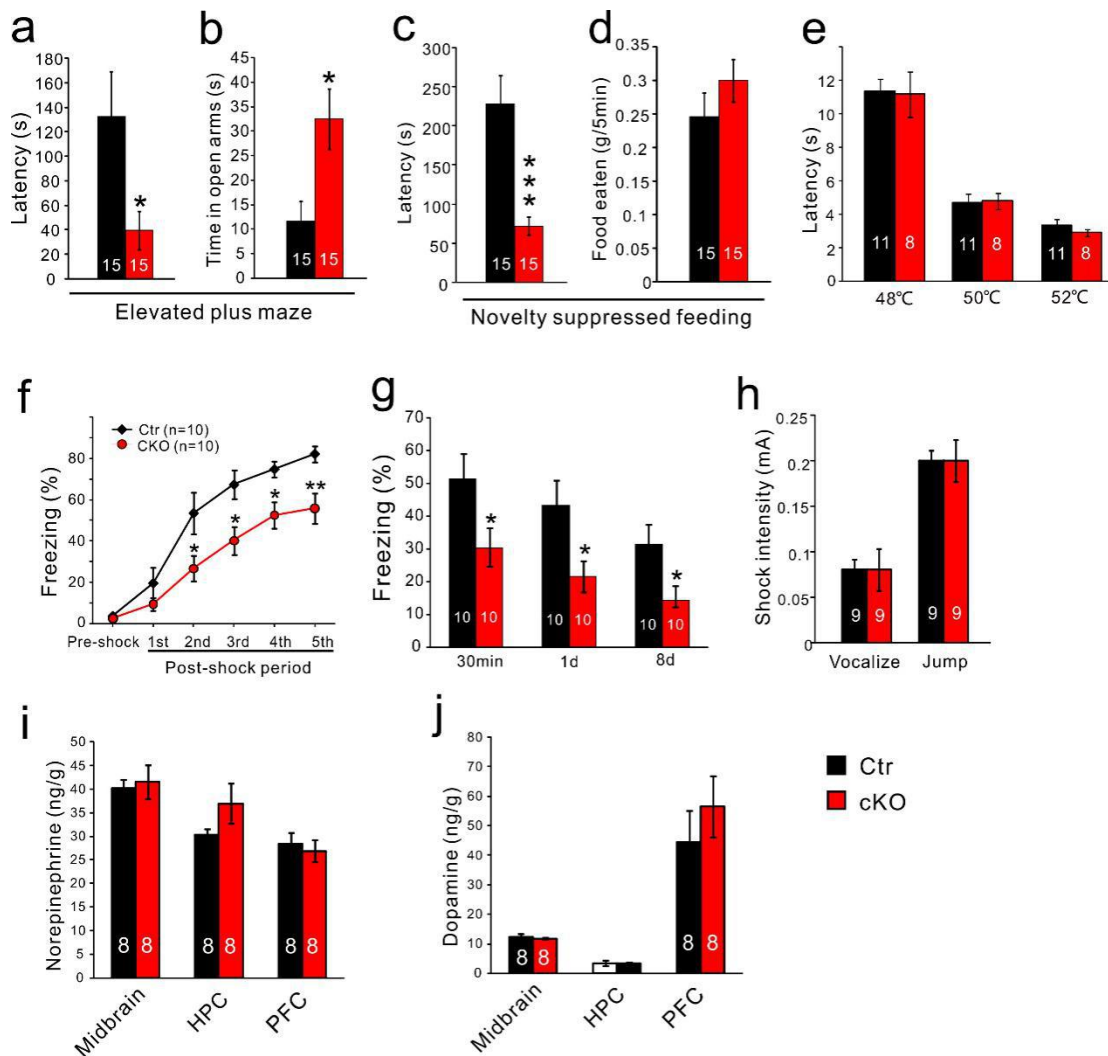

**Supplementary Fig. 3. Normal somatosensory sensation and levels of norepinephrine and dopamine in *Pten* cKO mice.**

**a, b.** The latency of entering into the open arm is reduced while time spent in the open arm is increased in *Pten* cKO mice compared with controls.

**c, d.** The latency of beginning eating food is reduced in the novelty suppressed feeding test in *Pten* cKO mice with no changes in food consumption compared with controls.

**e,** Thermal sensation shown by the withdraw latency after immersion of tail into water at indicated temperatures are comparable between control and *Pten* cKO mice.

**f, g.** Freezing responses are reduced in the foot shock conditioning (**f**) and retrieval of fear memory at 30 min, 1 day and 8 days post conditioning in *Pten* cKO mice compared with controls (**g**).

**h**, Sensitivity to foot shock revealed by increasing electric current until the occurrence of vocalize and jump in contextual fear memory test.

**i, j**. The levels of norepinephrine and dopamine in control and cKO brains are comparable. All the data are presented as the mean  $\pm$  s.e.m. \* $p < 0.05$ , \*\* $p < 0.01$ , \*\*\* $p < 0.001$ . Numbers of animal used are indicated.

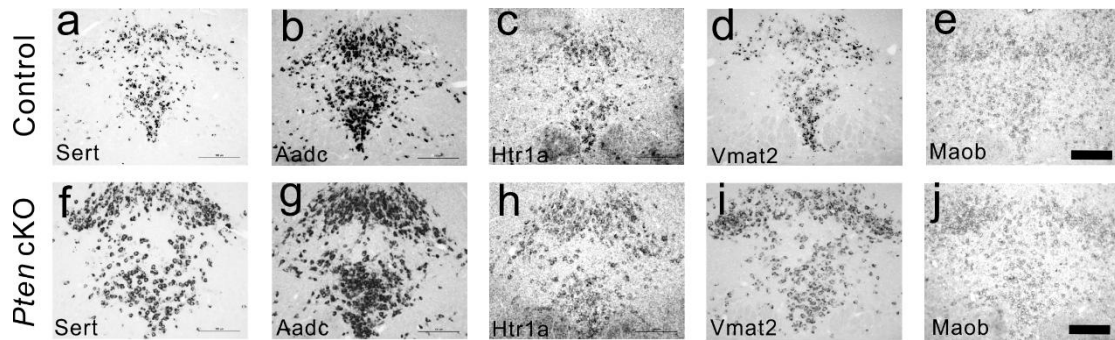

**Supplementary Fig. 4. In situ hybridization shows the distribution of *Sert*, *Aadc*, *Htr1a*, *Vmat2*, and *Maob* in the DRN of control and *Pten* cKO mice.**

**a-e**, *In situ* hybridization of *Sert*, *Aadc*, *Htr1a*, *Vmat2*, *Maob* in the DRN of control.

**f-j**, *In situ* hybridization of *Sert*, *Aadc*, *Htr1a*, *Vmat2*, *Maob* in the DRN of *Pten* cKO mice. Scale bars = 100  $\mu$ m.

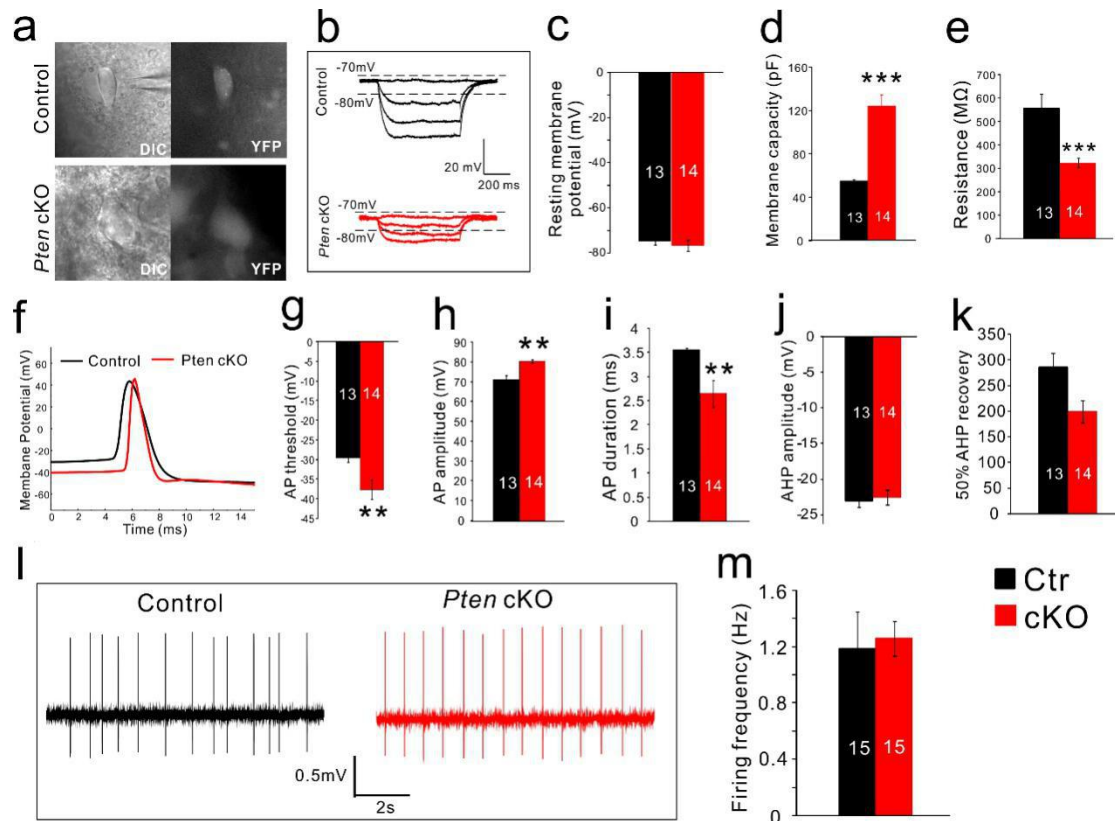

**Supplementary Fig. 5. Normal resting membrane potential and the ability for action potential generation in central 5-HT neurons of *Pten* cKO mice.**

**a.** Images show the representative YFP-labeled 5-HT neurons in the dorsal raphe nucleus of control and *Pten* cKO mice.

**b.** Raw data traces depicting changes in membrane potential of 5-HT neurons induced by hyperpolarizing current injection.

**c.** The resting membrane potential is unchanged in *Pten*-deficient 5-HT neurons.

**d.** The capacity of 5-HT neurons is larger in *Pten*-deficient 5-HT neurons.

**e.** The input resistance is decreased in *Pten*-deficient 5-HT neurons.

**f.** Representative recording traces showing individual action potentials (APs) induced by current injection in 5-HT neurons of control and *Pten* cKO mice.

**g-i.** *Pten*-deficient 5-HT neurons have more hyperpolarized threshold, increased amplitude and decreased duration of APs.

**j, k.** The amplitude and duration of afterhyperpolarization is unchanged in *Pten*-deficient 5-HT neurons.

**l, m.** AP firing rates are similar between control and *Pten*-deficient 5-HT neurons after bath application of 6.0  $\mu$ M PE,  $\alpha_1$ -adrenergic receptor agonist.

All the data are presented as the mean  $\pm$  s.e.m. \*\* $p < 0.01$  \*\*\* $p < 0.001$ . Numbers of neurons are indicated and 3-5 mice were used in each group.
